# Supplementary material
Source: publisher figshare collection journal article supplement (https://future-science-group.figshare.com/ndownloader/files/31631282)
Supplement: Supplementary file 1 [file 31631282]

**Supplementary Material:** Survey to determine vaccine acceptance and hesitancy including COVID-19 phobia of cancer patients in response to the COVID-19 pandemic

1. **Demographic Data and Clinical Characteristics**

Age

Gender

Level of education

Marriage status

Working status

Type of cancer

Stage

Treatment status( Active treatment or control)

Do you have a comorbid chronic disease?

Do you have a relatives or friend who died due to Covid-19?

1. **COVID-19 Phobia Scale Questions:**

Possible responses range from 1 to 5 (1 = Strongly disagree; 2 = Disagree; 3 = Agree; 4 = Generally agree; 5 = Strongly agree).

| 1. The fear of coming down with coronavirus makes me very anxious |
| --- |
| 1. I experience stomach-aches out of the fear of coronavirus |
| 1. After the coronavirus outbreak, I feel extremely anxious when I see people coughing |
| 1. The possibility of food supply shortage due to the coronavirus pandemic causes me anxiety |
| 1. I am extremely afraid that someone in my family might become infected by the coronavirus |
| 1. I experience chest pain out of the fear of coronavirus |
| 1. I actively avoid people I see sneezing after the coronavirus outbreak |
| 1. The possibility of shortages in cleaning supplies due to the coronavirus epidemic makes me nervous. |
| 1. The news of death due to coronavirus causes a great anxiety to me |
| 1. I experience tremors due to the fear of coronavirus |
| 1. Following the coronavirus pandemic, I have noticed that I spend extensive periods of time washing my hands |
| 1. I stock on food for fear of coronavirus |
| 1. The uncertainties surrounding the coronavirus worry me a lot. |
| 1. I experience sleep problems out of the fear of coronavirus |
| 1. The fear of coming down with coronavirus seriously impedes my social relationships |
| 1. After the coronavirus pandemic, I do not feel relaxed unless I constantly check on my supplies at home |
| 1. The speed with which the coronavirus is spreading is causing me a great panic |
| 1. The coronavirus is making me so nervous that I find myself unable to do what I used to have no problem doing. |
| 1. I can't control my anxiety about catching the coronavirus from others |
| 1. I passionately argue with people I think are irresponsible in the face of the coronavirus |

1. **COVID-19 Vaccine Related Questions:**

Have you had the flu (Influenza) vaccine?

- Yes

- No: I couldn't because:

A- I couldn't reach / B- I didn't want

Will you be vaccinated against COVID-19

- I will be as soon as I come

- undecided

- reject

The reason for those who want to be vaccinated:

- Fear of covid-19

- Request for protection

- Duty consciousness for society

- A desire to return to normal life

The reason for those who are undecided about the vaccine: :

- There should be more information on whether it works

- On safety

- Unsure about which vaccine to have

The reason for those who do not want to be vaccinated: :

- Lack of scientific studies

- Fear of side effects

- The idea that COVID-19 is a benign disease

Do you trust the advice your oncologist will give you?

-Yes

- Maybe

-No

Will you act in line with what your oncologist says or in line with your own opinion?

- Oncologist

- My own decision
